# Supplementary material for: Degradation characteristics, cell viability and host tissue responses of PDLLA-based scaffold with PRGD and β-TCP nanoparticles incorporation
Source: PubMed Central journal article supplement (PMC4881616; doi:10.1093/rb/rbw017), 2016-04-08
Supplement: 8524c0a572d2e3cf0532a8ea416c4722_rb-2016-008.pdf [file 8524c0a572d2e3cf0532a8ea416c4722_rb-2016-008.pdf]

## Supplements

Table.S1 Full names of tested scaffolds

| Abbreviation                  | Full name                                                                                                                                  |
|-------------------------------|--------------------------------------------------------------------------------------------------------------------------------------------|
| PDLLA(P)                      | poly(D,L-lactic acid)                                                                                                                      |
| PDLLA/ $\beta$ -TCP(PT)       | poly(D,L-lactic acid)/ $\beta$ -tricalcium phosphate                                                                                       |
| PDLLA/PRGD(PR)                | poly(D,L-lactic acid)/ RGD peptide modification of poly{(lactic acid)-co-[(glycolic acid )-alt-(L-lysine)]}                                |
| PDLLA/PRGD/ $\beta$ -TCP(PRT) | poly(D,L-lactic acid)/ RGD peptide modification of poly{(lactic acid)-co-[(glycolic acid )-alt-(L-lysine)]}/ $\beta$ -tricalcium phosphate |

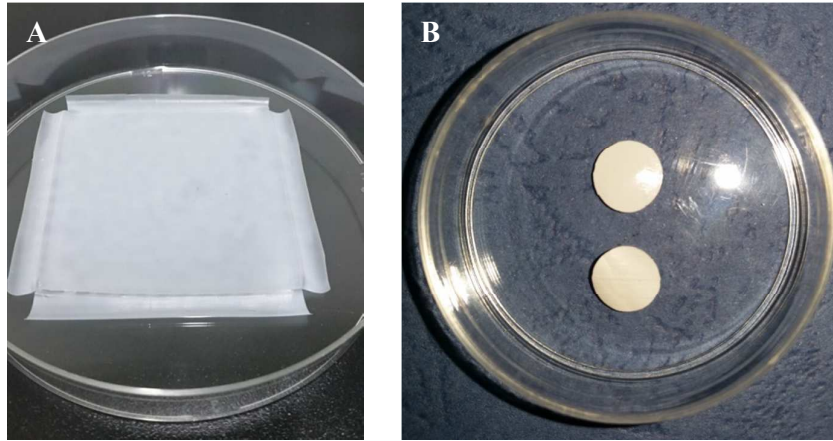

Fig S1.The forms of PRT scaffold.
